# Supplementary material
Source: publisher figshare collection journal article supplement (https://acs.figshare.com/ndownloader/files/4721977)
Supplement: Supplementary file 1 [file 4721977]

  
data_justin102a 
  
_audit_creation_method            SHELXL-97 
_chemical_name_systematic 
; 
 ? 
; 
_chemical_name_common             ? 
_chemical_melting_point           ? 
_chemical_formula_moiety          ? 
_chemical_formula_sum 
 'C37 H46 Cl2 Cu2 N8 O20' 
_chemical_formula_weight          1120.80 
  
loop_ 
 _atom_type_symbol 
 _atom_type_description 
 _atom_type_scat_dispersion_real 
 _atom_type_scat_dispersion_imag 
 _atom_type_scat_source 
 'C'  'C'   0.0033   0.0016 
 'International Tables Vol C Tables 4.2.6.8 and 6.1.1.4' 
 'H'  'H'   0.0000   0.0000 
 'International Tables Vol C Tables 4.2.6.8 and 6.1.1.4' 
 'N'  'N'   0.0061   0.0033 
 'International Tables Vol C Tables 4.2.6.8 and 6.1.1.4' 
 'O'  'O'   0.0106   0.0060 
 'International Tables Vol C Tables 4.2.6.8 and 6.1.1.4' 
 'Cu'  'Cu'   0.3201   1.2651 
 'International Tables Vol C Tables 4.2.6.8 and 6.1.1.4' 
 'Cl'  'Cl'   0.1484   0.1585 
 'International Tables Vol C Tables 4.2.6.8 and 6.1.1.4' 
  
_symmetry_cell_setting            Monoclinic 
_symmetry_space_group_name_H-M    P2(1)/c 
  
loop_ 
 _symmetry_equiv_pos_as_xyz 
 'x, y, z' 
 '-x, y+1/2, -z+1/2' 
 '-x, -y, -z' 
 'x, -y-1/2, z-1/2' 
  
_cell_length_a                    16.8155(8) 
_cell_length_b                    15.5036(7) 
_cell_length_c                    18.9048(8) 
_cell_angle_alpha                 90.00 
_cell_angle_beta                  100.917(2) 
_cell_angle_gamma                 90.00 
_cell_volume                      4839.3(4) 
_cell_formula_units_Z             4 
_cell_measurement_temperature     200(2) 
_cell_measurement_reflns_used     9999 
_cell_measurement_theta_min       2.47 
_cell_measurement_theta_max       33.90 
  
_exptl_crystal_description        block 
_exptl_crystal_colour             blue 
_exptl_crystal_size_max           0.5 
_exptl_crystal_size_mid           0.5 
_exptl_crystal_size_min           0.4 
_exptl_crystal_density_meas       0 
_exptl_crystal_density_diffrn     1.538 
_exptl_crystal_density_method     'not measured' 
_exptl_crystal_F_000              2304 
_exptl_absorpt_coefficient_mu     1.073 
_exptl_absorpt_correction_type    SADABS-multiscan 
_exptl_absorpt_correction_T_min   ? 
_exptl_absorpt_correction_T_max   ? 
_exptl_absorpt_process_details    ? 
  
_exptl_special_details 
; 
 ? 
; 
  
_diffrn_ambient_temperature       200(2) 
_diffrn_radiation_wavelength      0.71073 
_diffrn_radiation_type            MoK\a 
_diffrn_radiation_source          'fine-focus sealed tube' 
_diffrn_radiation_monochromator   graphite 
_diffrn_measurement_device_type   'CCD area detector' 
_diffrn_measurement_method        'phi and omega scans' 
_diffrn_detector_area_resol_mean  ? 
_diffrn_standards_number          ? 
_diffrn_standards_interval_count  ? 
_diffrn_standards_interval_time   ? 
_diffrn_standards_decay_%         ? 
_diffrn_reflns_number             118048 
_diffrn_reflns_av_R_equivalents   0.0345 
_diffrn_reflns_av_sigmaI/netI     0.0249 
_diffrn_reflns_limit_h_min        -26 
_diffrn_reflns_limit_h_max        26 
_diffrn_reflns_limit_k_min        -24 
_diffrn_reflns_limit_k_max        24 
_diffrn_reflns_limit_l_min        -27 
_diffrn_reflns_limit_l_max        29 
_diffrn_reflns_theta_min          2.30 
_diffrn_reflns_theta_max          34.32 
_reflns_number_total              20214 
_reflns_number_gt                 14794 
_reflns_threshold_expression      >2sigma(I) 
  
_computing_data_collection        'Bruker SMART' 
_computing_cell_refinement        'Bruker SMART' 
_computing_data_reduction         'Bruker SAINT' 
_computing_structure_solution     'SHELXS-97 (Sheldrick, 1990)' 
_computing_structure_refinement   'SHELXL-97 (Sheldrick, 1997)' 
_computing_molecular_graphics     'Bruker SHELXTL' 
_computing_publication_material   'Bruker SHELXTL' 
  
_refine_special_details 
; 
 Refinement of F^2^ against ALL reflections.  The weighted R-factor wR and 
 goodness of fit S are based on F^2^, conventional R-factors R are based 
 on F, with F set to zero for negative F^2^. The threshold expression of 
 F^2^ > 2sigma(F^2^) is used only for calculating R-factors(gt) etc. and is 
 not relevant to the choice of reflections for refinement.  R-factors based 
 on F^2^ are statistically about twice as large as those based on F, and R- 
 factors based on ALL data will be even larger. 
; 
  
_refine_ls_structure_factor_coef  Fsqd 
_refine_ls_matrix_type            full 
_refine_ls_weighting_scheme       calc 
_refine_ls_weighting_details 
 'calc w=1/[\s^2^(Fo^2^)+(0.0889P)^2^+5.1991P] where P=(Fo^2^+2Fc^2^)/3' 
_atom_sites_solution_primary      direct 
_atom_sites_solution_secondary    difmap 
_atom_sites_solution_hydrogens    geom 
_refine_ls_hydrogen_treatment     mixed 
_refine_ls_extinction_method      none 
_refine_ls_extinction_coef        ? 
_refine_ls_number_reflns          20214 
_refine_ls_number_parameters      678 
_refine_ls_number_restraints      30 
_refine_ls_R_factor_all           0.0818 
_refine_ls_R_factor_gt            0.0586 
_refine_ls_wR_factor_ref          0.1932 
_refine_ls_wR_factor_gt           0.1746 
_refine_ls_goodness_of_fit_ref    1.076 
_refine_ls_restrained_S_all       1.079 
_refine_ls_shift/su_max           0.003 
_refine_ls_shift/su_mean          0.000 
  
loop_ 
 _atom_site_label 
 _atom_site_type_symbol 
 _atom_site_fract_x 
 _atom_site_fract_y 
 _atom_site_fract_z 
 _atom_site_U_iso_or_equiv 
 _atom_site_adp_type 
 _atom_site_occupancy 
 _atom_site_symmetry_multiplicity 
 _atom_site_calc_flag 
 _atom_site_refinement_flags 
 _atom_site_disorder_assembly 
 _atom_site_disorder_group 
Cu1 Cu -0.205568(19) 0.171587(18) 0.244471(16) 0.03238(8) Uani 1 1 d . . . 
O1 O 0.06545(13) 0.3765(2) 0.15422(11) 0.0569(6) Uani 1 1 d . . . 
O2 O 0.06559(11) 0.37010(13) 0.27241(9) 0.0358(3) Uani 1 1 d . . . 
O3 O -0.24574(15) 0.05023(13) 0.28622(13) 0.0472(5) Uani 1 1 d . . . 
H3A H -0.2567 0.0586 0.3261 0.071 Uiso 1 1 calc R . . 
O4 O -0.23553(13) 0.13778(14) 0.14260(11) 0.0439(4) Uani 1 1 d . . . 
H4A H -0.1947 0.1353 0.1249 0.066 Uiso 1 1 calc R . . 
N1 N -0.31258(14) 0.23121(14) 0.24279(12) 0.0373(4) Uani 1 1 d . . . 
N2 N -0.31172(14) 0.31389(14) 0.26793(13) 0.0371(4) Uani 1 1 d . . . 
N3 N -0.16461(13) 0.22508(12) 0.34109(10) 0.0306(3) Uani 1 1 d . . . 
N4 N -0.18967(13) 0.30632(12) 0.35344(10) 0.0317(4) Uani 1 1 d . . . 
C1 C -0.4040(2) 0.4343(2) 0.2867(3) 0.0712(12) Uani 1 1 d . . . 
H1A H -0.3536 0.4636 0.3032 0.107 Uiso 1 1 calc R . . 
H1B H -0.4345 0.4325 0.3248 0.107 Uiso 1 1 calc R . . 
H1C H -0.4345 0.4645 0.2461 0.107 Uiso 1 1 calc R . . 
C2 C -0.38761(18) 0.3446(2) 0.2648(2) 0.0486(7) Uani 1 1 d . . . 
C3 C -0.43867(19) 0.2783(2) 0.2374(2) 0.0575(8) Uani 1 1 d . . . 
H3B H -0.4950 0.2793 0.2291 0.069 Uiso 1 1 calc R . . 
C4 C -0.39035(17) 0.20941(19) 0.22444(17) 0.0445(6) Uani 1 1 d . . . 
C5 C -0.4176(2) 0.1223(2) 0.1961(2) 0.0579(8) Uani 1 1 d . . . 
H5A H -0.3713 0.0880 0.1917 0.087 Uiso 1 1 calc R . . 
H5B H -0.4521 0.1282 0.1497 0.087 Uiso 1 1 calc R . . 
H5C H -0.4470 0.0947 0.2287 0.087 Uiso 1 1 calc R . . 
C6 C -0.1869(2) 0.41400(19) 0.45239(16) 0.0536(8) Uani 1 1 d . . . 
H6A H -0.2175 0.4477 0.4141 0.080 Uiso 1 1 calc R . . 
H6B H -0.1379 0.4440 0.4726 0.080 Uiso 1 1 calc R . . 
H6C H -0.2184 0.4050 0.4891 0.080 Uiso 1 1 calc R . . 
C7 C -0.16648(18) 0.32899(15) 0.42357(13) 0.0360(5) Uani 1 1 d . . . 
C8 C -0.12426(18) 0.25967(17) 0.45710(13) 0.0386(5) Uani 1 1 d . . . 
H8A H -0.1002 0.2557 0.5055 0.046 Uiso 1 1 calc R . . 
C9 C -0.12442(16) 0.19598(15) 0.40412(12) 0.0338(4) Uani 1 1 d . . . 
C10 C -0.08817(19) 0.10814(17) 0.41268(15) 0.0419(5) Uani 1 1 d . . . 
H10A H -0.0976 0.0793 0.3669 0.063 Uiso 1 1 calc R . . 
H10B H -0.1126 0.0757 0.4462 0.063 Uiso 1 1 calc R . . 
H10C H -0.0309 0.1127 0.4304 0.063 Uiso 1 1 calc R . . 
C11 C -0.23441(15) 0.35511(15) 0.29372(13) 0.0329(4) Uani 1 1 d . . . 
H11A H -0.2450 0.4124 0.3117 0.039 Uiso 1 1 calc R . . 
C12 C -0.18680(15) 0.36706(14) 0.23321(12) 0.0306(4) Uani 1 1 d . . . 
C13 C -0.22823(16) 0.37862(17) 0.16259(14) 0.0385(5) Uani 1 1 d . . . 
H13A H -0.2845 0.3777 0.1523 0.046 Uiso 1 1 calc R . . 
C14 C -0.18497(18) 0.3915(2) 0.10743(14) 0.0445(6) Uani 1 1 d . . . 
H14A H -0.2126 0.4001 0.0605 0.053 Uiso 1 1 calc R . . 
C15 C -0.10115(17) 0.39162(18) 0.12221(13) 0.0395(5) Uani 1 1 d . . . 
H15A H -0.0725 0.3996 0.0852 0.047 Uiso 1 1 calc R . . 
C16 C -0.05968(15) 0.37976(15) 0.19261(11) 0.0311(4) Uani 1 1 d . . . 
C17 C -0.10286(15) 0.36847(15) 0.24796(12) 0.0309(4) Uani 1 1 d . . . 
H17A H -0.0752 0.3618 0.2951 0.037 Uiso 1 1 calc R . . 
C18 C 0.03071(16) 0.37545(17) 0.20674(12) 0.0350(5) Uani 1 1 d . . . 
Cu2 Cu 0.177832(18) 0.337561(18) 0.312233(15) 0.02954(7) Uani 1 1 d . . . 
O5 O -0.09078(15) 0.1422(2) 0.12479(11) 0.0583(6) Uani 1 1 d . . . 
O6 O -0.09343(11) 0.13901(13) 0.24260(9) 0.0369(4) Uani 1 1 d . . . 
O7 O 0.21787(15) 0.45561(13) 0.37491(12) 0.0470(5) Uani 1 1 d . . . 
H7A H 0.2326 0.4430 0.4175 0.071 Uiso 1 1 calc R . . 
O8 O 0.20946(12) 0.37519(13) 0.22180(10) 0.0372(4) Uani 1 1 d . . . 
H8B H 0.1689 0.3801 0.1903 0.056 Uiso 1 1 calc R . . 
N5 N 0.28432(13) 0.27691(13) 0.34488(11) 0.0338(4) Uani 1 1 d . . . 
N6 N 0.28376(13) 0.19361(13) 0.36843(11) 0.0337(4) Uani 1 1 d . . . 
N7 N 0.13695(12) 0.28174(12) 0.39353(10) 0.0290(3) Uani 1 1 d . . . 
N8 N 0.16202(12) 0.20013(12) 0.41317(10) 0.0288(3) Uani 1 1 d . . . 
C19 C 0.3758(2) 0.0716(3) 0.4118(3) 0.0724(12) Uani 1 1 d . . . 
H19A H 0.3255 0.0431 0.4136 0.109 Uiso 1 1 calc R . . 
H19B H 0.4088 0.0726 0.4591 0.109 Uiso 1 1 calc R . . 
H19C H 0.4036 0.0410 0.3796 0.109 Uiso 1 1 calc R . . 
C20 C 0.35931(18) 0.16139(19) 0.38556(18) 0.0449(6) Uani 1 1 d . . . 
C21 C 0.41031(17) 0.2267(2) 0.37339(18) 0.0479(6) Uani 1 1 d . . . 
H21A H 0.4665 0.2241 0.3802 0.057 Uiso 1 1 calc R . . 
C22 C 0.36236(16) 0.29729(18) 0.34904(15) 0.0401(5) Uani 1 1 d . . . 
C23 C 0.38846(19) 0.3850(2) 0.3305(2) 0.0519(7) Uani 1 1 d . . . 
H23A H 0.3416 0.4203 0.3144 0.078 Uiso 1 1 calc R . . 
H23B H 0.4195 0.3806 0.2930 0.078 Uiso 1 1 calc R . . 
H23C H 0.4211 0.4107 0.3724 0.078 Uiso 1 1 calc R . . 
C24 C 0.1572(3) 0.09032(18) 0.50868(16) 0.0546(8) Uani 1 1 d . . . 
H24A H 0.1891 0.0577 0.4811 0.082 Uiso 1 1 calc R . . 
H24B H 0.1077 0.0600 0.5101 0.082 Uiso 1 1 calc R . . 
H24C H 0.1871 0.0978 0.5568 0.082 Uiso 1 1 calc R . . 
C25 C 0.13818(17) 0.17613(15) 0.47473(12) 0.0341(5) Uani 1 1 d . . . 
C26 C 0.09472(18) 0.24421(16) 0.49423(13) 0.0368(5) Uani 1 1 d . . . 
H26A H 0.0693 0.2467 0.5338 0.044 Uiso 1 1 calc R . . 
C27 C 0.09606(15) 0.30901(15) 0.44301(12) 0.0316(4) Uani 1 1 d . . . 
C28 C 0.05891(18) 0.39625(16) 0.44030(14) 0.0391(5) Uani 1 1 d . . . 
H28A H 0.0697 0.4268 0.3989 0.059 Uiso 1 1 calc R . . 
H28B H 0.0816 0.4275 0.4832 0.059 Uiso 1 1 calc R . . 
H28C H 0.0015 0.3908 0.4370 0.059 Uiso 1 1 calc R . . 
C29 C 0.20670(15) 0.15171(14) 0.36795(12) 0.0307(4) Uani 1 1 d . . . 
H29A H 0.2176 0.0942 0.3892 0.037 Uiso 1 1 calc R . . 
C30 C 0.15927(15) 0.14036(14) 0.29134(12) 0.0301(4) Uani 1 1 d . . . 
C31 C 0.20123(17) 0.12735(17) 0.23516(14) 0.0385(5) Uani 1 1 d . . . 
H31A H 0.2576 0.1271 0.2444 0.046 Uiso 1 1 calc R . . 
C32 C 0.15853(19) 0.1148(2) 0.16512(15) 0.0451(6) Uani 1 1 d . . . 
H32A H 0.1864 0.1059 0.1277 0.054 Uiso 1 1 calc R . . 
C33 C 0.07540(18) 0.11551(18) 0.15133(13) 0.0406(5) Uani 1 1 d . . . 
H33A H 0.0473 0.1066 0.1046 0.049 Uiso 1 1 calc R . . 
C34 C 0.03284(15) 0.12950(15) 0.20669(12) 0.0324(4) Uani 1 1 d . . . 
C35 C 0.07511(14) 0.14088(14) 0.27703(11) 0.0300(4) Uani 1 1 d . . . 
H35A H 0.0469 0.1488 0.3144 0.036 Uiso 1 1 calc R . . 
C36 C -0.05721(16) 0.13638(17) 0.18969(12) 0.0355(5) Uani 1 1 d . . . 
Cl1 Cl 0.35552(13) 0.61958(16) 0.07041(13) 0.0405(7) Uani 0.64(3) 1 d PD . . 
Cl1' Cl 0.3678(8) 0.586(2) 0.0796(6) 0.086(5) Uani 0.36(3) 1 d P . . 
O9 O 0.3421(3) 0.7028(3) 0.0919(2) 0.1121(14) Uani 1 1 d D . . 
O10 O 0.3716(2) 0.6150(2) 0.00069(17) 0.0867(10) Uani 1 1 d D . . 
O11 O 0.28750(17) 0.5646(2) 0.07465(16) 0.0787(9) Uani 1 1 d D . . 
O12 O 0.4239(2) 0.5848(3) 0.1200(2) 0.1222(17) Uani 1 1 d D . . 
Cl2 Cl 0.34369(5) 0.37598(7) 0.55151(5) 0.0628(2) Uani 1 1 d D . . 
O14' O 0.3554(9) 0.2957(5) 0.5277(5) 0.240(9) Uani 0.676(12) 1 d PD . . 
O13' O 0.2668(3) 0.4053(4) 0.5187(2) 0.0753(19) Uani 0.676(12) 1 d PD . . 
O16 O 0.3486(2) 0.3764(3) 0.62627(15) 0.0858(10) Uani 1 1 d D . . 
O15' O 0.3984(5) 0.4344(9) 0.5338(6) 0.242(9) Uani 0.676(12) 1 d PD . . 
O15 O 0.4180(6) 0.3746(11) 0.5337(7) 0.126(8) Uani 0.324(12) 1 d PD . . 
O14 O 0.3046(8) 0.2966(7) 0.5262(6) 0.126(8) Uani 0.324(12) 1 d PD . . 
O17 O 0.3236(3) 0.3045(3) 0.1660(3) 0.1178(16) Uani 1 1 d . . . 
O13 O 0.2975(12) 0.4414(9) 0.5185(7) 0.25(2) Uani 0.324(12) 1 d PD . . 
O20 O 0.4313(5) 0.4039(4) 0.1351(5) 0.191(3) Uani 1 1 d . . . 
O19 O 0.4348(9) 0.6043(15) 0.5109(6) 0.499(17) Uani 1 1 d . . . 
C38 C 0.4891(8) 0.3530(12) 0.0728(7) 0.234(8) Uani 1 1 d . . . 
O18 O 0.3525(2) 0.7039(3) 0.4518(2) 0.1049(13) Uani 1 1 d . . . 
H4B H -0.277(3) 0.165(2) 0.108(2) 0.053(11) Uiso 1 1 d . . . 
H8C H 0.249(2) 0.352(2) 0.210(2) 0.048(10) Uiso 1 1 d . . . 
H3B H -0.227(3) 0.005(3) 0.283(2) 0.058(11) Uiso 1 1 d . . . 
H7B H 0.229(3) 0.500(3) 0.368(3) 0.075(15) Uiso 1 1 d . . . 
  
loop_ 
 _atom_site_aniso_label 
 _atom_site_aniso_U_11 
 _atom_site_aniso_U_22 
 _atom_site_aniso_U_33 
 _atom_site_aniso_U_23 
 _atom_site_aniso_U_13 
 _atom_site_aniso_U_12 
Cu1 0.03794(15) 0.03009(13) 0.02892(13) -0.00655(10) 0.00583(11) -0.00353(10) 
O1 0.0442(11) 0.0998(19) 0.0283(9) 0.0102(10) 0.0113(8) -0.0070(12) 
O2 0.0380(8) 0.0456(9) 0.0244(7) 0.0066(6) 0.0074(6) 0.0028(7) 
O3 0.0616(13) 0.0306(9) 0.0545(12) -0.0069(8) 0.0239(10) -0.0056(9) 
O4 0.0483(11) 0.0479(10) 0.0341(9) -0.0116(8) 0.0044(8) -0.0057(9) 
N1 0.0393(10) 0.0327(9) 0.0395(10) -0.0055(8) 0.0067(8) -0.0057(8) 
N2 0.0382(10) 0.0322(9) 0.0425(11) -0.0049(8) 0.0114(8) -0.0034(8) 
N3 0.0396(9) 0.0263(8) 0.0271(8) -0.0031(6) 0.0093(7) -0.0033(7) 
N4 0.0425(10) 0.0274(8) 0.0270(8) -0.0042(6) 0.0114(7) -0.0037(7) 
C1 0.0496(18) 0.0492(18) 0.121(4) -0.019(2) 0.032(2) 0.0020(14) 
C2 0.0390(13) 0.0430(14) 0.0667(19) -0.0067(13) 0.0176(13) 0.0004(11) 
C3 0.0345(13) 0.0561(18) 0.083(2) -0.0060(17) 0.0135(14) -0.0038(12) 
C4 0.0397(13) 0.0410(13) 0.0514(15) -0.0034(11) 0.0047(11) -0.0086(10) 
C5 0.0485(16) 0.0490(17) 0.073(2) -0.0116(15) 0.0015(15) -0.0161(13) 
C6 0.089(2) 0.0376(13) 0.0351(13) -0.0103(10) 0.0133(14) -0.0013(14) 
C7 0.0548(14) 0.0307(10) 0.0251(9) -0.0050(8) 0.0138(9) -0.0084(9) 
C8 0.0560(15) 0.0362(11) 0.0239(9) -0.0011(8) 0.0080(9) -0.0073(10) 
C9 0.0455(12) 0.0301(10) 0.0273(9) 0.0001(8) 0.0108(9) -0.0070(9) 
C10 0.0562(15) 0.0324(11) 0.0373(12) 0.0040(9) 0.0092(11) -0.0018(10) 
C11 0.0391(11) 0.0279(9) 0.0327(10) -0.0025(8) 0.0096(9) -0.0013(8) 
C12 0.0381(11) 0.0264(9) 0.0272(9) -0.0001(7) 0.0060(8) -0.0029(8) 
C13 0.0388(12) 0.0401(12) 0.0339(11) 0.0065(9) 0.0004(9) -0.0013(9) 
C14 0.0473(14) 0.0548(16) 0.0281(11) 0.0115(10) -0.0012(10) -0.0027(12) 
C15 0.0485(13) 0.0455(13) 0.0239(9) 0.0072(9) 0.0054(9) -0.0032(11) 
C16 0.0389(11) 0.0313(10) 0.0228(8) 0.0051(7) 0.0049(8) -0.0025(8) 
C17 0.0383(11) 0.0308(10) 0.0234(8) 0.0016(7) 0.0052(8) -0.0028(8) 
C18 0.0407(12) 0.0392(11) 0.0255(9) 0.0063(8) 0.0077(8) -0.0044(9) 
Cu2 0.03462(14) 0.02872(13) 0.02631(12) 0.00418(9) 0.00838(10) -0.00175(10) 
O5 0.0511(12) 0.0962(19) 0.0264(9) 0.0001(10) 0.0043(8) -0.0049(12) 
O6 0.0403(9) 0.0454(9) 0.0260(7) -0.0046(7) 0.0085(6) 0.0024(7) 
O7 0.0672(14) 0.0298(9) 0.0425(10) 0.0016(8) 0.0063(9) -0.0057(9) 
O8 0.0397(9) 0.0423(9) 0.0318(8) 0.0049(7) 0.0124(7) -0.0039(7) 
N5 0.0369(9) 0.0306(9) 0.0350(9) 0.0043(7) 0.0097(8) -0.0020(7) 
N6 0.0354(9) 0.0316(9) 0.0346(9) 0.0025(7) 0.0077(7) 0.0010(7) 
N7 0.0361(9) 0.0259(8) 0.0256(8) 0.0023(6) 0.0070(7) -0.0006(7) 
N8 0.0394(9) 0.0251(7) 0.0228(7) 0.0026(6) 0.0081(7) 0.0011(7) 
C19 0.0502(18) 0.0517(19) 0.113(4) 0.026(2) 0.010(2) 0.0137(15) 
C20 0.0381(12) 0.0424(13) 0.0543(16) 0.0063(11) 0.0090(11) 0.0069(10) 
C21 0.0339(12) 0.0494(15) 0.0601(18) 0.0072(13) 0.0083(12) 0.0023(11) 
C22 0.0371(12) 0.0407(12) 0.0439(13) 0.0013(10) 0.0112(10) -0.0043(10) 
C23 0.0423(14) 0.0460(15) 0.069(2) 0.0045(14) 0.0157(14) -0.0106(12) 
C24 0.099(3) 0.0333(12) 0.0381(13) 0.0102(10) 0.0298(15) 0.0074(14) 
C25 0.0531(14) 0.0287(9) 0.0222(9) 0.0003(7) 0.0110(9) -0.0052(9) 
C26 0.0547(14) 0.0324(10) 0.0265(9) -0.0017(8) 0.0155(9) -0.0045(10) 
C27 0.0412(11) 0.0282(9) 0.0265(9) -0.0038(7) 0.0091(8) -0.0035(8) 
C28 0.0511(14) 0.0319(11) 0.0367(12) -0.0033(9) 0.0145(10) 0.0019(10) 
C29 0.0375(10) 0.0266(9) 0.0297(9) 0.0006(7) 0.0106(8) -0.0002(8) 
C30 0.0401(11) 0.0271(9) 0.0257(9) -0.0021(7) 0.0127(8) -0.0017(8) 
C31 0.0431(12) 0.0410(12) 0.0355(11) -0.0067(9) 0.0181(10) -0.0025(10) 
C32 0.0553(16) 0.0528(15) 0.0326(11) -0.0113(11) 0.0220(11) -0.0052(12) 
C33 0.0543(15) 0.0444(13) 0.0256(10) -0.0073(9) 0.0140(10) -0.0058(11) 
C34 0.0431(12) 0.0315(10) 0.0244(9) -0.0030(7) 0.0114(8) -0.0014(8) 
C35 0.0391(11) 0.0295(9) 0.0237(8) -0.0022(7) 0.0114(8) -0.0013(8) 
C36 0.0448(12) 0.0365(11) 0.0257(9) -0.0044(8) 0.0077(9) -0.0015(9) 
Cl1 0.0380(7) 0.0413(15) 0.0419(7) 0.0010(6) 0.0070(5) -0.0044(6) 
Cl1' 0.056(3) 0.151(14) 0.055(2) -0.027(5) 0.018(2) -0.042(6) 
O9 0.138(4) 0.096(3) 0.111(3) -0.039(2) 0.044(3) -0.010(3) 
O10 0.102(2) 0.100(2) 0.0724(19) -0.0290(17) 0.0527(18) -0.0244(19) 
O11 0.0583(15) 0.115(3) 0.0625(16) 0.0055(16) 0.0101(12) -0.0343(16) 
O12 0.070(2) 0.155(4) 0.125(4) 0.033(3) -0.026(2) -0.020(2) 
Cl2 0.0542(4) 0.0861(6) 0.0519(4) 0.0179(4) 0.0198(3) 0.0196(4) 
O14' 0.47(2) 0.151(9) 0.131(8) 0.010(7) 0.124(12) 0.192(13) 
O13' 0.061(3) 0.120(5) 0.045(2) 0.013(2) 0.0112(18) 0.022(3) 
O16 0.086(2) 0.116(3) 0.0535(16) -0.0073(17) 0.0074(15) -0.020(2) 
O15' 0.117(7) 0.39(2) 0.231(13) 0.163(14) 0.067(8) -0.062(11) 
O15 0.065(7) 0.165(16) 0.162(16) -0.090(14) 0.060(9) -0.023(8) 
O14 0.134(12) 0.166(17) 0.064(7) -0.006(8) -0.012(7) -0.114(13) 
O17 0.115(3) 0.130(4) 0.124(3) -0.049(3) 0.061(3) 0.013(3) 
O13 0.39(4) 0.093(12) 0.175(19) -0.026(11) -0.15(2) 0.136(19) 
O20 0.172(6) 0.148(5) 0.280(9) 0.076(6) 0.108(6) 0.049(5) 
O19 0.393(17) 0.97(4) 0.168(8) -0.181(15) 0.133(10) -0.50(2) 
C38 0.168(10) 0.37(2) 0.164(10) 0.120(12) 0.024(8) -0.069(12) 
O18 0.087(2) 0.114(3) 0.093(3) -0.021(2) -0.036(2) 0.012(2) 
  
_geom_special_details 
; 
 All esds (except the esd in the dihedral angle between two l.s. planes) 
 are estimated using the full covariance matrix.  The cell esds are taken 
 into account individually in the estimation of esds in distances, angles 
 and torsion angles; correlations between esds in cell parameters are only 
 used when they are defined by crystal symmetry.  An approximate (isotropic) 
 treatment of cell esds is used for estimating esds involving l.s. planes. 
; 
  
loop_ 
 _geom_bond_atom_site_label_1 
 _geom_bond_atom_site_label_2 
 _geom_bond_distance 
 _geom_bond_site_symmetry_2 
 _geom_bond_publ_flag 
Cu1 O6 1.9589(19) . ? 
Cu1 O4 1.9672(19) . ? 
Cu1 N3 2.0056(19) . ? 
Cu1 N1 2.018(2) . ? 
Cu1 O3 2.196(2) . ? 
O1 C18 1.244(3) . ? 
O2 C18 1.271(3) . ? 
O2 Cu2 1.9610(18) . ? 
N1 C4 1.331(3) . ? 
N1 N2 1.366(3) . ? 
N2 C2 1.353(4) . ? 
N2 C11 1.448(3) . ? 
N3 C9 1.332(3) . ? 
N3 N4 1.362(3) . ? 
N4 C7 1.355(3) . ? 
N4 C11 1.446(3) . ? 
C1 C2 1.492(5) . ? 
C2 C3 1.376(5) . ? 
C3 C4 1.391(5) . ? 
C4 C5 1.492(4) . ? 
C6 C7 1.491(4) . ? 
C7 C8 1.375(4) . ? 
C8 C9 1.406(3) . ? 
C9 C10 1.488(4) . ? 
C11 C12 1.527(3) . ? 
C12 C17 1.386(3) . ? 
C12 C13 1.396(3) . ? 
C13 C14 1.394(4) . ? 
C14 C15 1.384(4) . ? 
C15 C16 1.393(3) . ? 
C16 C17 1.393(3) . ? 
C16 C18 1.494(4) . ? 
Cu2 O8 1.9724(17) . ? 
Cu2 N7 1.9959(18) . ? 
Cu2 N5 2.013(2) . ? 
Cu2 O7 2.215(2) . ? 
O5 C36 1.253(3) . ? 
O6 C36 1.267(3) . ? 
N5 C22 1.338(3) . ? 
N5 N6 1.367(3) . ? 
N6 C20 1.346(3) . ? 
N6 C29 1.448(3) . ? 
N7 C27 1.330(3) . ? 
N7 N8 1.363(3) . ? 
N8 C25 1.353(3) . ? 
N8 C29 1.450(3) . ? 
C19 C20 1.487(5) . ? 
C20 C21 1.375(4) . ? 
C21 C22 1.385(4) . ? 
C22 C23 1.491(4) . ? 
C24 C25 1.485(4) . ? 
C25 C26 1.374(4) . ? 
C26 C27 1.398(3) . ? 
C27 C28 1.487(3) . ? 
C29 C30 1.525(3) . ? 
C30 C35 1.390(3) . ? 
C30 C31 1.397(3) . ? 
C31 C32 1.395(4) . ? 
C32 C33 1.373(4) . ? 
C33 C34 1.392(3) . ? 
C34 C35 1.395(3) . ? 
C34 C36 1.491(4) . ? 
Cl1 Cl1' 0.58(3) . ? 
Cl1 O9 1.384(4) . ? 
Cl1 O10 1.396(3) . ? 
Cl1 O11 1.441(3) . ? 
Cl1 O12 1.443(4) . ? 
Cl1' O12 1.095(15) . ? 
Cl1' O11 1.375(6) . ? 
Cl1' O10 1.573(17) . ? 
Cl1' O9 1.89(3) . ? 
Cl2 O14' 1.351(6) . ? 
Cl2 O15 1.354(7) . ? 
Cl2 O13 1.356(7) . ? 
Cl2 O15' 1.377(6) . ? 
Cl2 O16 1.400(3) . ? 
Cl2 O13' 1.401(4) . ? 
Cl2 O14 1.434(7) . ? 
O14' O14 0.849(17) . ? 
O14' O15 1.604(16) . ? 
O13' O13 0.76(2) . ? 
O13' O14 1.797(15) . ? 
O15' O15 0.985(17) . ? 
O15' O13 1.669(19) . ? 
O20 C38 1.840(18) . ? 
  
loop_ 
 _geom_angle_atom_site_label_1 
 _geom_angle_atom_site_label_2 
 _geom_angle_atom_site_label_3 
 _geom_angle 
 _geom_angle_site_symmetry_1 
 _geom_angle_site_symmetry_3 
 _geom_angle_publ_flag 
O6 Cu1 O4 89.00(8) . . ? 
O6 Cu1 N3 87.55(8) . . ? 
O4 Cu1 N3 169.09(9) . . ? 
O6 Cu1 N1 167.53(9) . . ? 
O4 Cu1 N1 92.54(9) . . ? 
N3 Cu1 N1 88.64(9) . . ? 
O6 Cu1 O3 98.53(9) . . ? 
O4 Cu1 O3 94.84(9) . . ? 
N3 Cu1 O3 95.91(8) . . ? 
N1 Cu1 O3 93.67(9) . . ? 
C18 O2 Cu2 128.62(17) . . ? 
C4 N1 N2 105.9(2) . . ? 
C4 N1 Cu1 135.79(19) . . ? 
N2 N1 Cu1 118.27(16) . . ? 
C2 N2 N1 111.5(2) . . ? 
C2 N2 C11 129.7(2) . . ? 
N1 N2 C11 118.7(2) . . ? 
C9 N3 N4 106.31(18) . . ? 
C9 N3 Cu1 134.67(16) . . ? 
N4 N3 Cu1 118.32(15) . . ? 
C7 N4 N3 111.5(2) . . ? 
C7 N4 C11 129.7(2) . . ? 
N3 N4 C11 118.81(18) . . ? 
N2 C2 C3 105.7(3) . . ? 
N2 C2 C1 122.6(3) . . ? 
C3 C2 C1 131.8(3) . . ? 
C2 C3 C4 107.2(3) . . ? 
N1 C4 C3 109.7(3) . . ? 
N1 C4 C5 122.9(3) . . ? 
C3 C4 C5 127.4(3) . . ? 
N4 C7 C8 106.0(2) . . ? 
N4 C7 C6 122.9(2) . . ? 
C8 C7 C6 131.1(2) . . ? 
C7 C8 C9 106.8(2) . . ? 
N3 C9 C8 109.4(2) . . ? 
N3 C9 C10 122.4(2) . . ? 
C8 C9 C10 128.3(2) . . ? 
N4 C11 N2 109.46(19) . . ? 
N4 C11 C12 112.3(2) . . ? 
N2 C11 C12 111.5(2) . . ? 
C17 C12 C13 119.7(2) . . ? 
C17 C12 C11 120.6(2) . . ? 
C13 C12 C11 119.7(2) . . ? 
C14 C13 C12 119.8(2) . . ? 
C15 C14 C13 120.3(2) . . ? 
C14 C15 C16 119.9(2) . . ? 
C15 C16 C17 119.8(2) . . ? 
C15 C16 C18 119.0(2) . . ? 
C17 C16 C18 121.2(2) . . ? 
C12 C17 C16 120.4(2) . . ? 
O1 C18 O2 125.5(2) . . ? 
O1 C18 C16 118.2(2) . . ? 
O2 C18 C16 116.3(2) . . ? 
O2 Cu2 O8 89.38(8) . . ? 
O2 Cu2 N7 87.73(8) . . ? 
O8 Cu2 N7 169.87(8) . . ? 
O2 Cu2 N5 166.75(9) . . ? 
O8 Cu2 N5 91.93(8) . . ? 
N7 Cu2 N5 88.71(8) . . ? 
O2 Cu2 O7 99.55(9) . . ? 
O8 Cu2 O7 96.59(8) . . ? 
N7 Cu2 O7 93.47(8) . . ? 
N5 Cu2 O7 93.40(9) . . ? 
C36 O6 Cu1 129.13(17) . . ? 
C22 N5 N6 105.7(2) . . ? 
C22 N5 Cu2 135.52(18) . . ? 
N6 N5 Cu2 118.73(15) . . ? 
C20 N6 N5 111.4(2) . . ? 
C20 N6 C29 129.6(2) . . ? 
N5 N6 C29 118.90(19) . . ? 
C27 N7 N8 106.13(18) . . ? 
C27 N7 Cu2 134.65(16) . . ? 
N8 N7 Cu2 118.59(14) . . ? 
C25 N8 N7 111.29(18) . . ? 
C25 N8 C29 129.48(19) . . ? 
N7 N8 C29 119.22(17) . . ? 
N6 C20 C21 106.0(2) . . ? 
N6 C20 C19 122.4(3) . . ? 
C21 C20 C19 131.6(3) . . ? 
C20 C21 C22 107.2(2) . . ? 
N5 C22 C21 109.6(2) . . ? 
N5 C22 C23 122.1(3) . . ? 
C21 C22 C23 128.3(3) . . ? 
N8 C25 C26 106.2(2) . . ? 
N8 C25 C24 122.9(2) . . ? 
C26 C25 C24 130.9(2) . . ? 
C25 C26 C27 106.7(2) . . ? 
N7 C27 C26 109.7(2) . . ? 
N7 C27 C28 122.3(2) . . ? 
C26 C27 C28 128.0(2) . . ? 
N6 C29 N8 109.09(18) . . ? 
N6 C29 C30 111.35(18) . . ? 
N8 C29 C30 112.54(19) . . ? 
C35 C30 C31 119.7(2) . . ? 
C35 C30 C29 120.96(19) . . ? 
C31 C30 C29 119.3(2) . . ? 
C32 C31 C30 119.9(3) . . ? 
C33 C32 C31 120.1(2) . . ? 
C32 C33 C34 120.6(2) . . ? 
C33 C34 C35 119.6(2) . . ? 
C33 C34 C36 119.7(2) . . ? 
C35 C34 C36 120.6(2) . . ? 
C30 C35 C34 120.1(2) . . ? 
O5 C36 O6 125.2(3) . . ? 
O5 C36 C34 117.8(2) . . ? 
O6 C36 C34 116.9(2) . . ? 
Cl1' Cl1 O9 145.8(7) . . ? 
Cl1' Cl1 O10 96.6(6) . . ? 
O9 Cl1 O10 113.3(3) . . ? 
Cl1' Cl1 O11 71.8(6) . . ? 
O9 Cl1 O11 111.1(3) . . ? 
O10 Cl1 O11 108.7(2) . . ? 
Cl1' Cl1 O12 43.3(6) . . ? 
O9 Cl1 O12 108.1(3) . . ? 
O10 Cl1 O12 108.7(3) . . ? 
O11 Cl1 O12 106.7(3) . . ? 
Cl1 Cl1' O12 115(2) . . ? 
Cl1 Cl1' O11 84.5(16) . . ? 
O12 Cl1' O11 138.7(15) . . ? 
Cl1 Cl1' O10 61.9(12) . . ? 
O12 Cl1' O10 118.6(5) . . ? 
O11 Cl1' O10 102.7(10) . . ? 
Cl1 Cl1' O9 24.3(8) . . ? 
O12 Cl1' O9 96.3(14) . . ? 
O11 Cl1' O9 89.5(15) . . ? 
O10 Cl1' O9 83.6(15) . . ? 
Cl1 O9 Cl1' 9.9(4) . . ? 
Cl1 O10 Cl1' 21.5(11) . . ? 
Cl1' O11 Cl1 23.7(14) . . ? 
Cl1' O12 Cl1 21.4(17) . . ? 
O14' Cl2 O15 72.7(7) . . ? 
O14' Cl2 O13 130.0(8) . . ? 
O15 Cl2 O13 111.9(7) . . ? 
O14' Cl2 O15' 112.3(5) . . ? 
O15 Cl2 O15' 42.3(7) . . ? 
O13 Cl2 O15' 75.3(9) . . ? 
O14' Cl2 O16 110.8(4) . . ? 
O15 Cl2 O16 111.7(6) . . ? 
O13 Cl2 O16 112.4(6) . . ? 
O15' Cl2 O16 109.1(5) . . ? 
O14' Cl2 O13' 109.4(6) . . ? 
O15 Cl2 O13' 135.5(7) . . ? 
O13 Cl2 O13' 32.1(9) . . ? 
O15' Cl2 O13' 106.4(5) . . ? 
O16 Cl2 O13' 108.6(2) . . ? 
O14' Cl2 O14 35.4(7) . . ? 
O15 Cl2 O14 106.8(6) . . ? 
O13 Cl2 O14 107.6(6) . . ? 
O15' Cl2 O14 140.3(7) . . ? 
O16 Cl2 O14 106.1(5) . . ? 
O13' Cl2 O14 78.7(7) . . ? 
O14 O14' Cl2 77.7(7) . . ? 
O14 O14' O15 129.2(10) . . ? 
Cl2 O14' O15 53.7(5) . . ? 
O13 O13' Cl2 70.7(7) . . ? 
O13 O13' O14 117.3(10) . . ? 
Cl2 O13' O14 51.5(3) . . ? 
O15 O15' Cl2 67.6(6) . . ? 
O15 O15' O13 113.0(11) . . ? 
Cl2 O15' O13 51.8(5) . . ? 
O15' O15 Cl2 70.1(6) . . ? 
O15' O15 O14' 120.2(9) . . ? 
Cl2 O15 O14' 53.5(4) . . ? 
O14' O14 Cl2 66.9(6) . . ? 
O14' O14 O13' 110.9(10) . . ? 
Cl2 O14 O13' 49.8(4) . . ? 
O13' O13 Cl2 77.2(8) . . ? 
O13' O13 O15' 128.3(10) . . ? 
Cl2 O13 O15' 52.9(5) . . ? 
  
_diffrn_measured_fraction_theta_max    0.999 
_diffrn_reflns_theta_full              34.32 
_diffrn_measured_fraction_theta_full   0.999 
_refine_diff_density_max    1.312 
_refine_diff_density_min   -1.143 
_refine_diff_density_rms    0.101 
